# Supplementary material for: Alkoxysilyl functionalized polynorbornenes with enhanced selectivity for heavy hydrocarbon separations
Source: Royal Society of Chemistry journal article supplement (doi:10.1039/c6ra10383a), 2016-01-01
Supplement: c6ra10383a1.pdf [file c6ra10383a1.pdf]

## Supplementary Information: Alkoxysilyl Functionalized Polynorbornenes with Enhanced Selectivity for Heavy Hydrocarbon Separations

### *Synthesis of the trimethylsilyl norbornene monomer*

Under nitrogen, a 100-mL Schlenk flask was charged with cyclopentadiene (4.75 ml, 35.2 mmol) and vinyltrimethyl silane (31 mL, 211.6 mmol), heated to 205 °C, and stirred for 3 hours. After 3 hours, the reaction mixture was cooled to room temperature before it was distilled and isolated as a clear liquid at 74% yield.

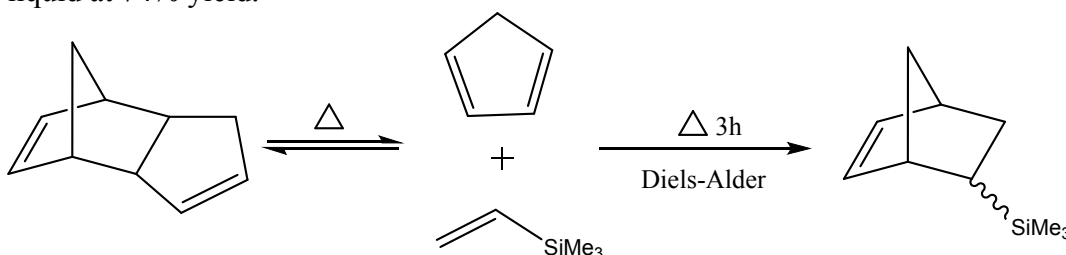

**Figure S1.** Cracking of dicyclopentadiene and subsequent Diels-Alder reaction with vinyl trimethylsilane

### *Viscosity testing of low molecular weight addition-type oligomers produced from nickel catalysis*

Inherent viscosity results of addition-type polymers prepared from nickel naphthenate (Nph) catalyst conditions. Viscosity testing performed using 1.0 g/dL solution in toluene at 35 °C.

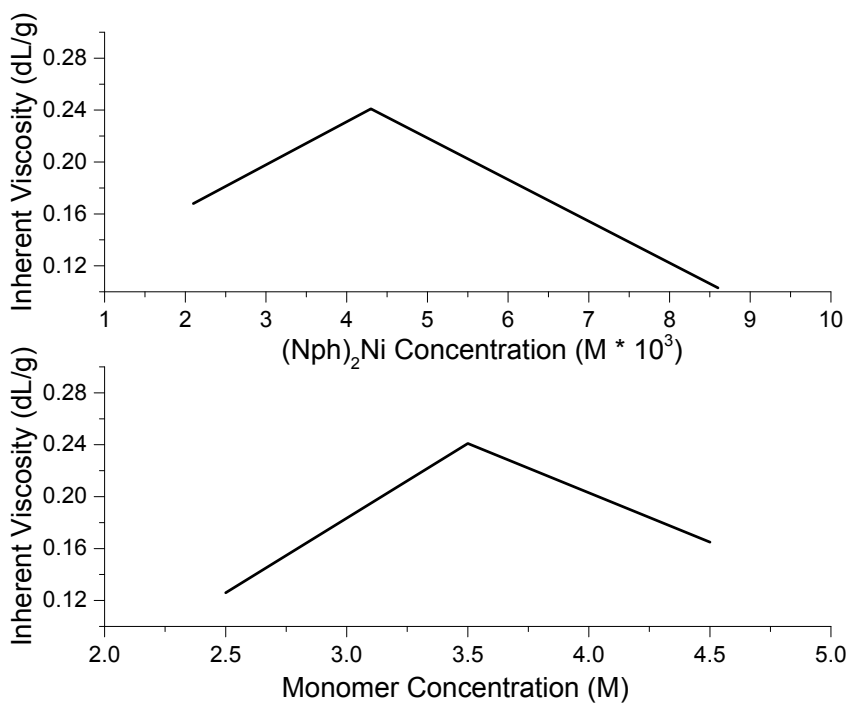

**Figure S2.** Nickel catalysts gave low inherent viscosities in toluene for several monomer and catalyst concentrations

*Gel permeation chromatography (GPC) of ROMP-SiMe<sub>3</sub>, and GPC of APN-SiMe<sub>3</sub> synthesized from nickel (Ni) catalyst and palladium (Pd) catalyst*

**Table S1.** GPC confirmed that nickel naphthenate produced molecular weight species of insufficient molecular weight for film formation

| 30 °C                          | APN-SiMe <sub>3</sub> [Ni(nph) <sub>2</sub> catalyst] |
|--------------------------------|-------------------------------------------------------|
| M <sub>n</sub>                 | 28774                                                 |
| M <sub>w</sub>                 | 63998                                                 |
| M <sub>z</sub>                 | 117740                                                |
| M <sub>p</sub>                 | 57165                                                 |
| M <sub>w</sub> /M <sub>n</sub> | 2.224                                                 |
| Intrinsic Viscosity            | 0.1589                                                |
| Sample Recovery (%)            | 99.26                                                 |
| dn/dc                          | 2.738                                                 |

**Table S2.** GPC results for high molecular polymers used for film casting

| 30 °C                          | ROMP-SiMe <sub>3</sub> | APN-SiMe <sub>3</sub> (Pd catalyst) |
|--------------------------------|------------------------|-------------------------------------|
| M <sub>n</sub>                 | 60194                  | 122070                              |
| M <sub>w</sub>                 | 102180                 | 153110                              |
| M <sub>z</sub>                 | 236270                 | 172770                              |
| M <sub>p</sub>                 | 80227                  | 176610                              |
| M <sub>w</sub> /M <sub>n</sub> | 1.698                  | 1.254                               |
| Intrinsic Viscosity            | 0.5506                 | 0.3387                              |
| Sample Recovery (%)            | 99.673                 | 106.35                              |
| dn/dc                          | 0.0373                 | 0.0405                              |

*Thermogravimetric analysis showed high thermal stability of the synthesized polymers*

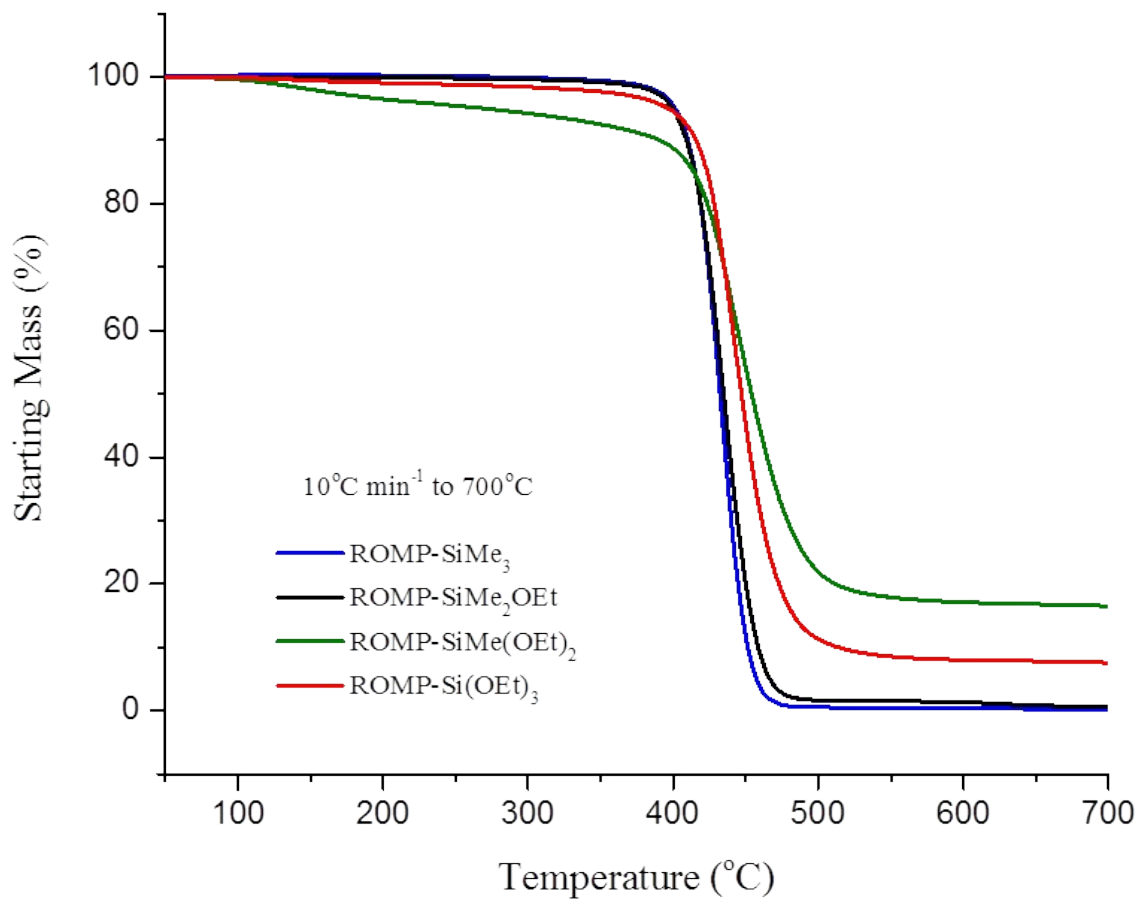

**Figure S3.** Thermal stability comparison of the ROMP polymers

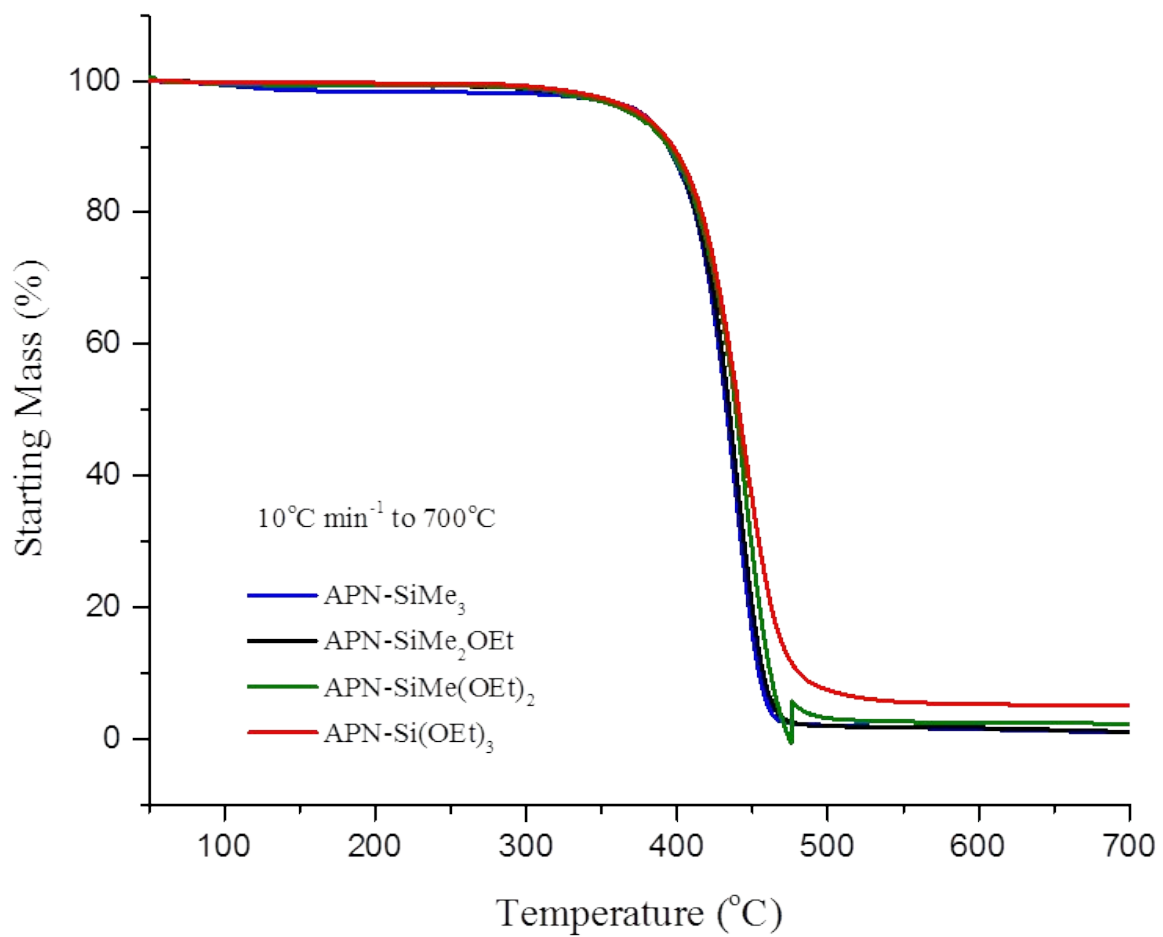

**Figure S4.** Thermal stability comparison of the addition-type polymers

*Infrared spectroscopy of the synthesized polymers*

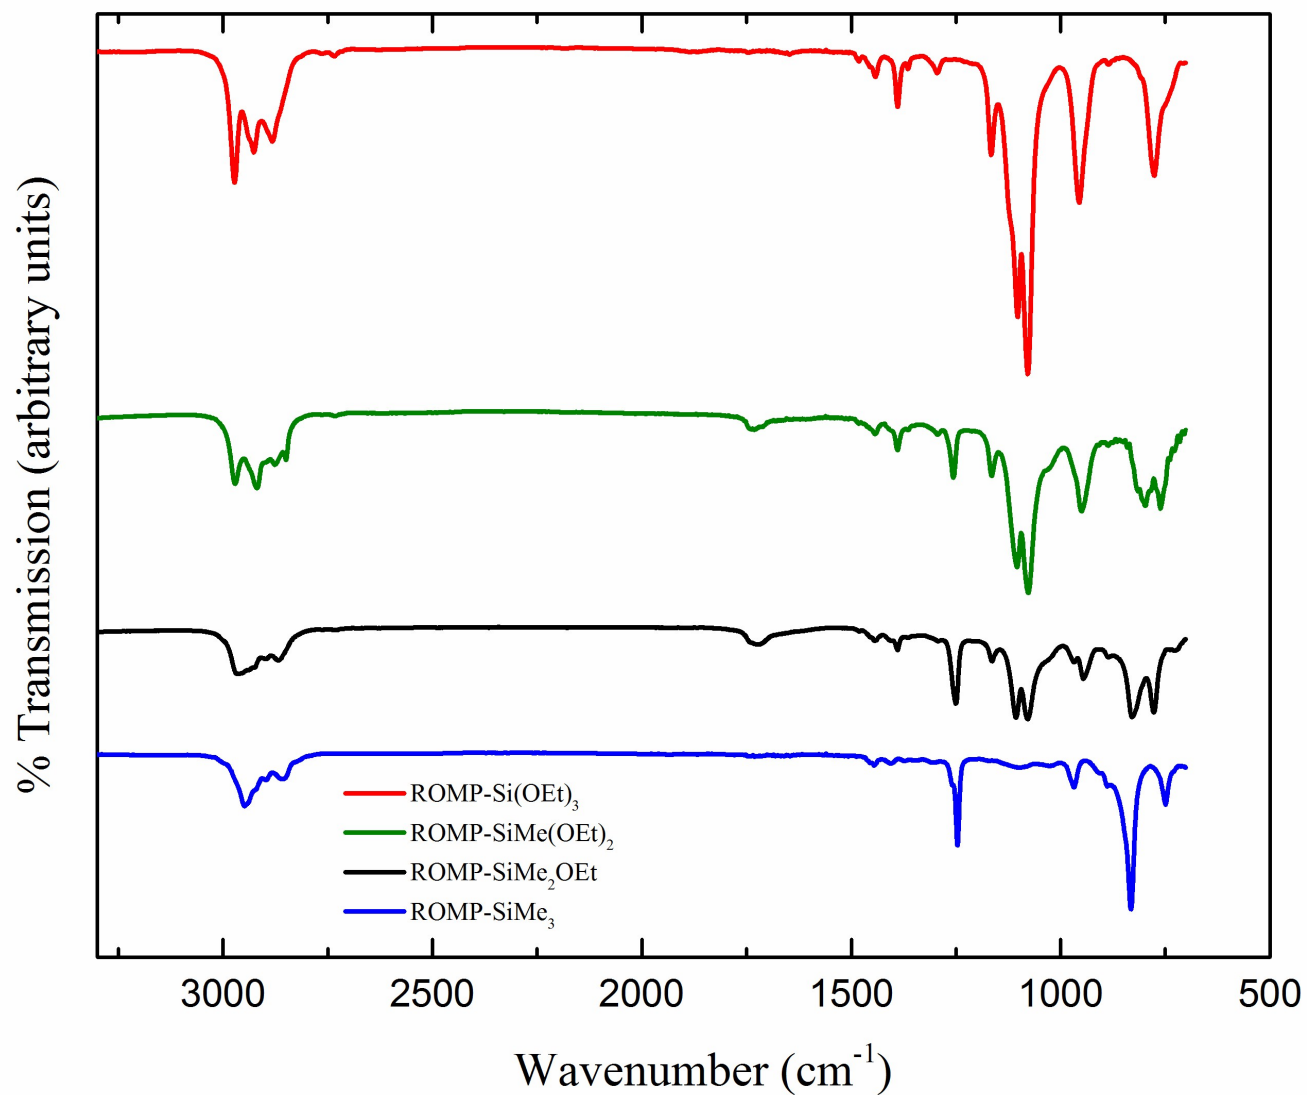

**Figure S5.** ATR-FTIR shows varying ethoxysilyl and methylsilyl content in the ROMP polymers

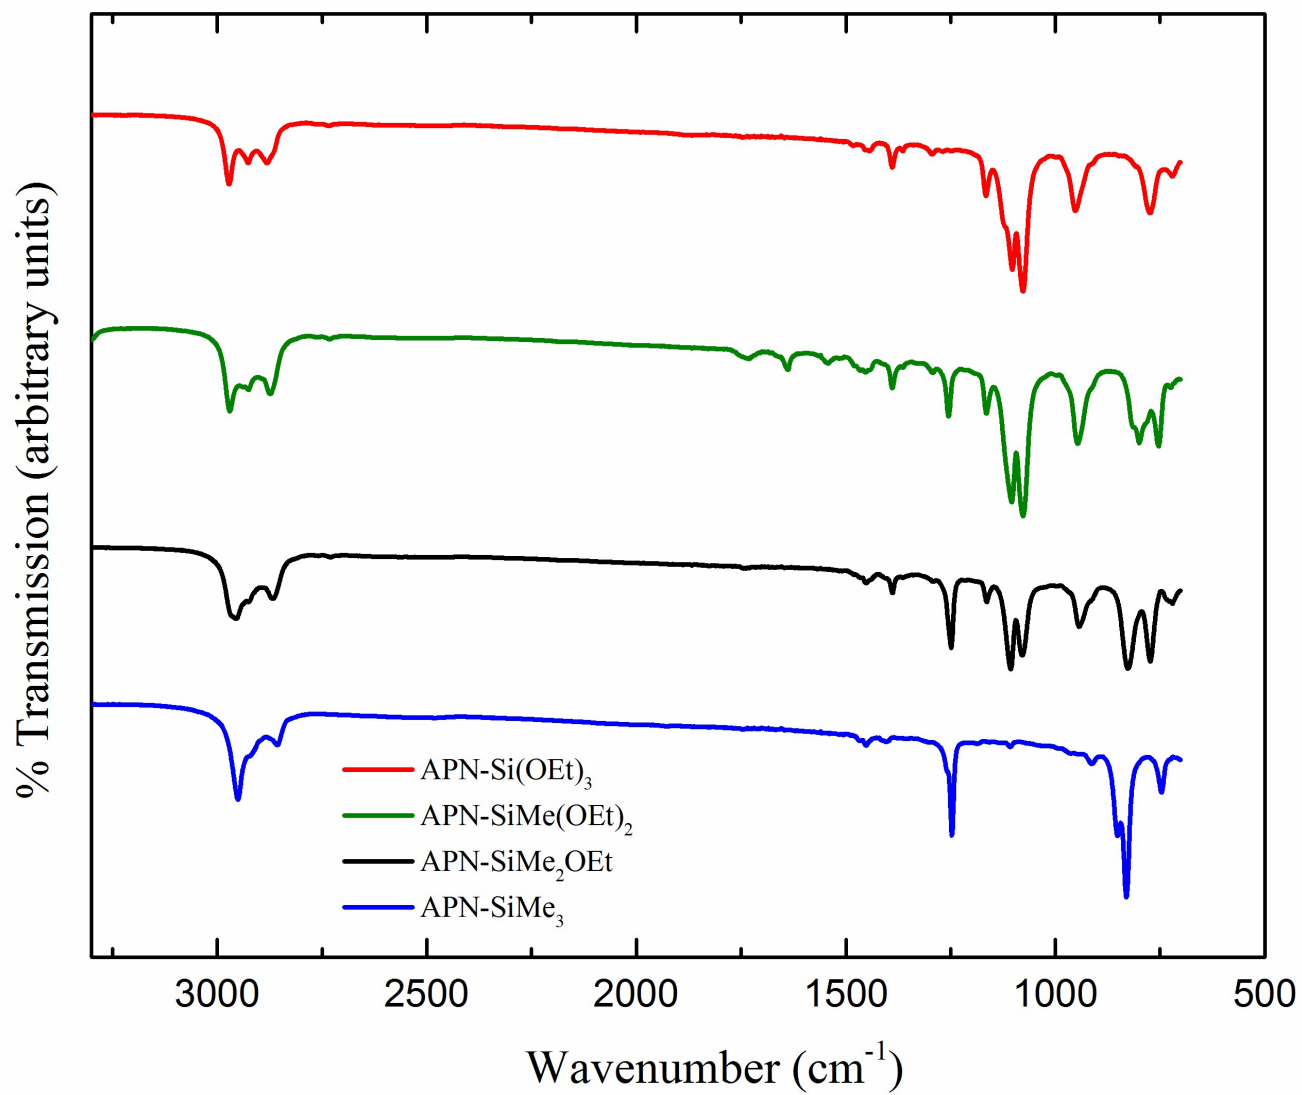

**Figure S6.** ATR-FTIR shows varying ethoxysilyl and methylsilyl content in the addition-type polymers

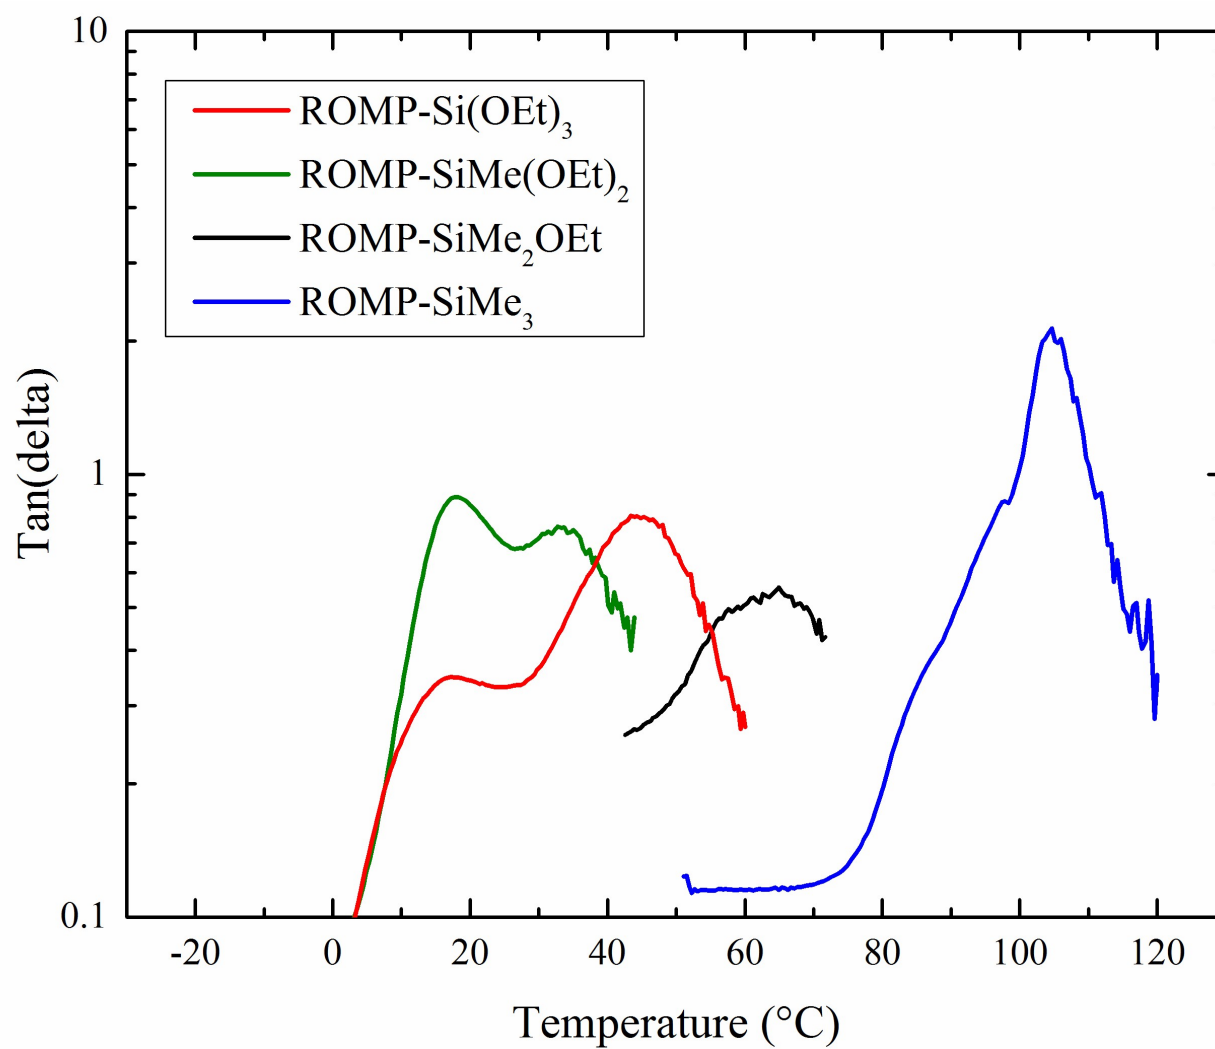

Figure S7. Glass transition temperatures of ROMP polymers from Tan (delta) peaks

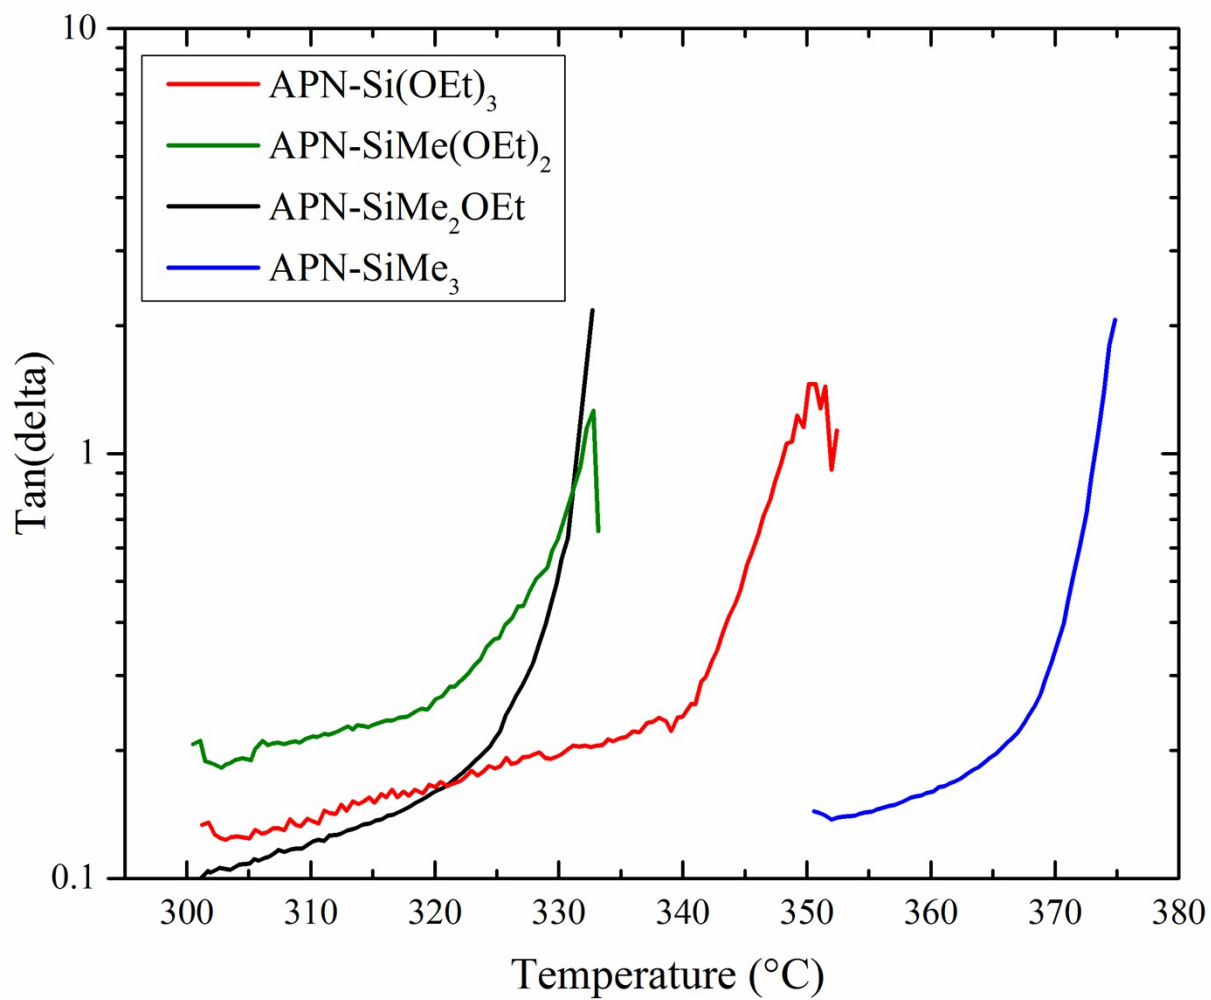

**Figure S8.** Glass transition temperatures of addition-type polymers from Tan ( $\delta$ ) peaks



*<sup>1</sup>H-NMR and <sup>13</sup>C-NMR spectroscopy of monomers and <sup>1</sup>H-NMR of polymers with appropriate integrations and peak designations*

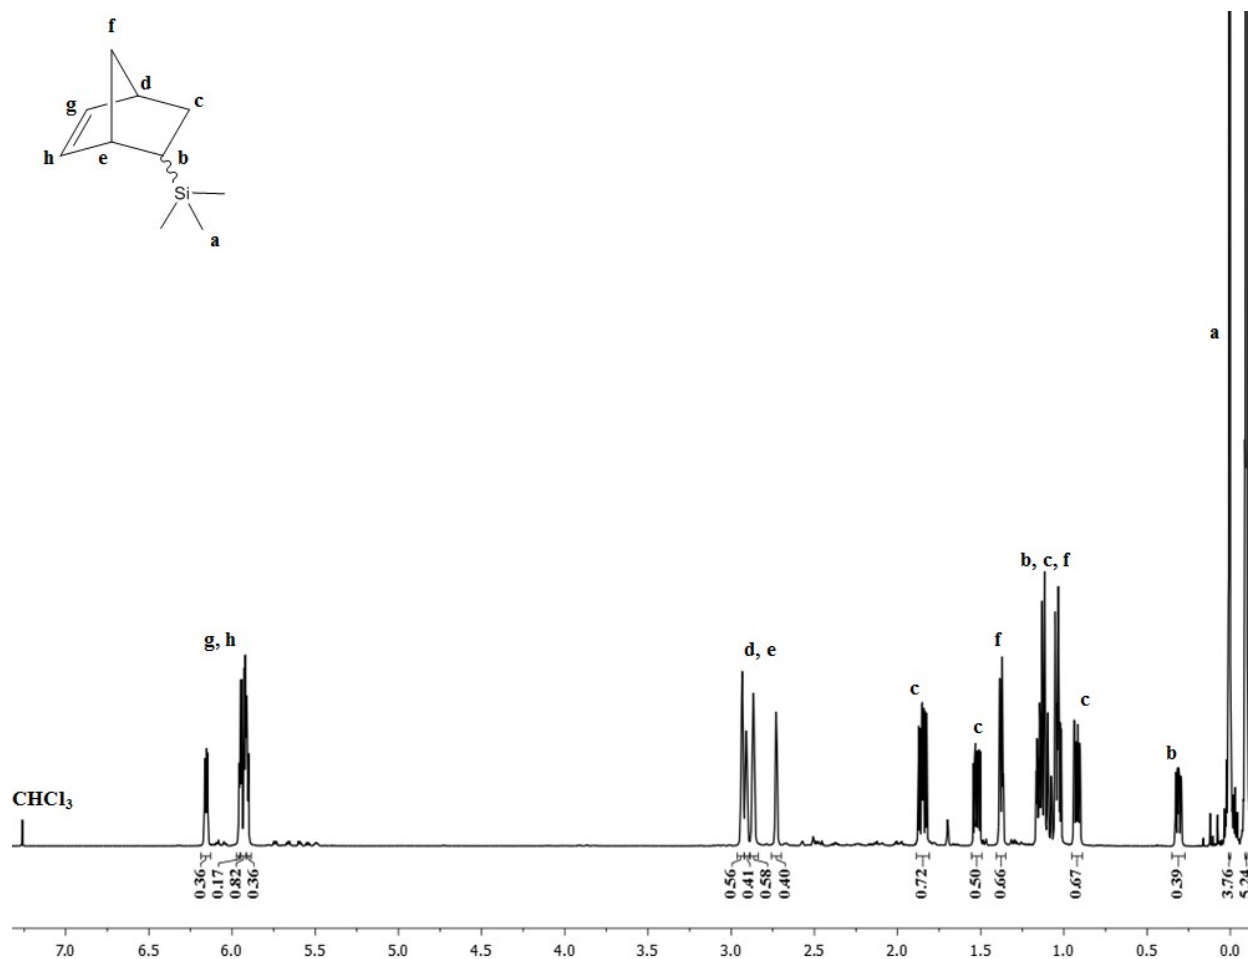

**Figure S9.** <sup>1</sup>H-NMR with appropriate peak positions and integrations for trimethylsilyl norbornene

NMR spectra are in agreement with the formation of trimethylsilyl norbornene.

<sup>1</sup>H NMR (CDCl<sub>3</sub>): δ 6.16 (dd, 1H, minor), 5.95 (dd, 1H, minor), 5.93 (dd, 1H, major), 5.92 (dd, 1H, major), 2.93 (br s, 1H, major), 2.91 (br s, 1H, minor), 2.87 (br s, 1H, major), 2.73 (br s, 1H, minor), 1.85 (ddd, 1H, major), 1.52 (ddd, 1H, minor), 1.38 (ddd, 1H, major), 1.16 (m, 1H, minor), 1.15 (m, 1H, major), 1.13 (m, 1H, minor), 1.12 (m, 1H, major), 1.05 (m, 1H, minor), 1.03 (m, 1H, major), 0.92 (ddd, 1H, major), 0.31 (ddd, 1H, minor), 0.00 (s, 3H, minor), -0.10 (s, 3H, major)

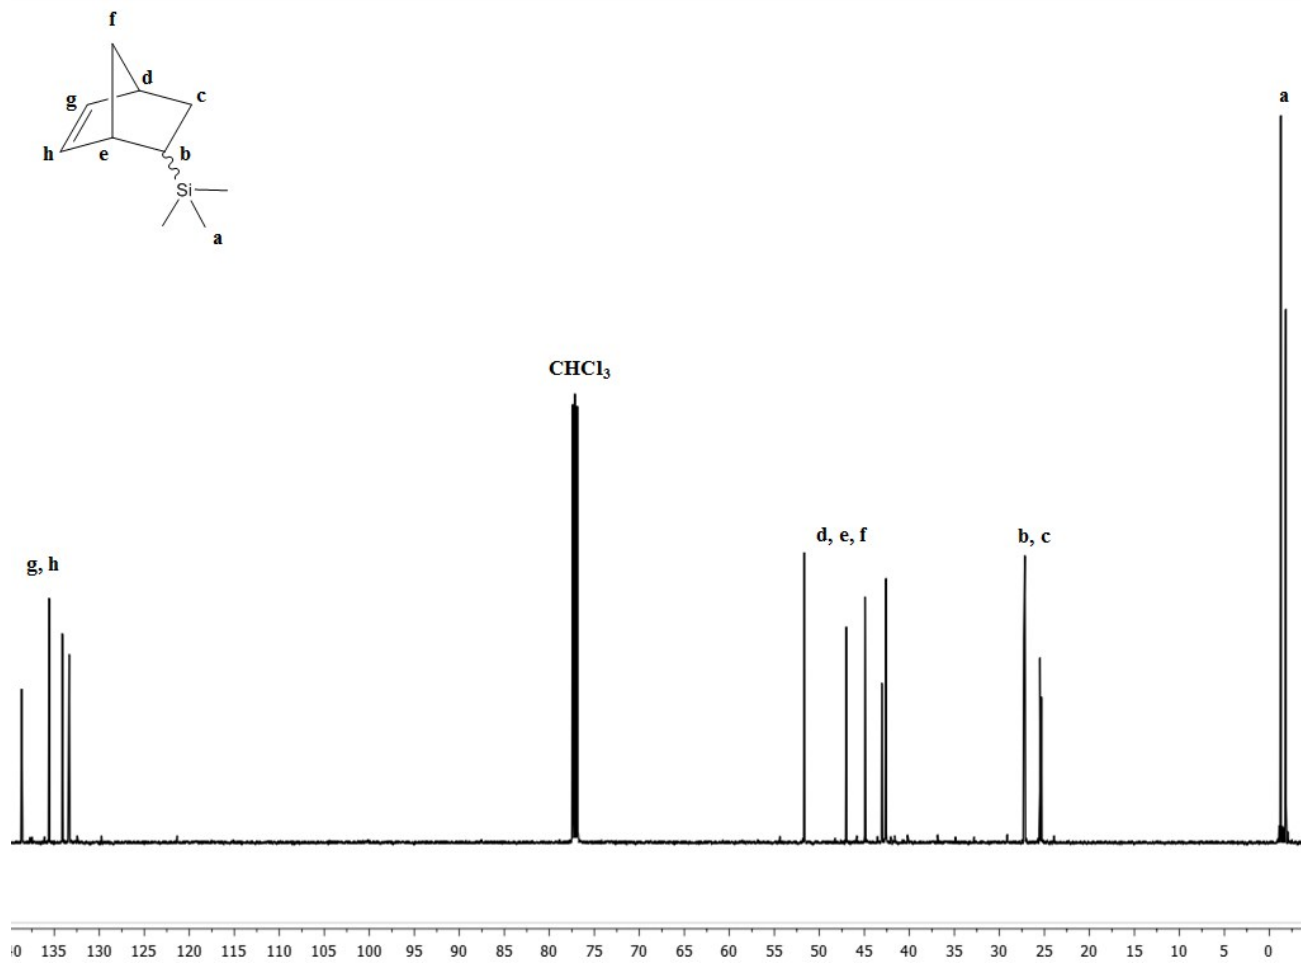

**Figure S10.**  $^{13}\text{C}$ -NMR with appropriate peak positions for trimethylsilyl norbornene

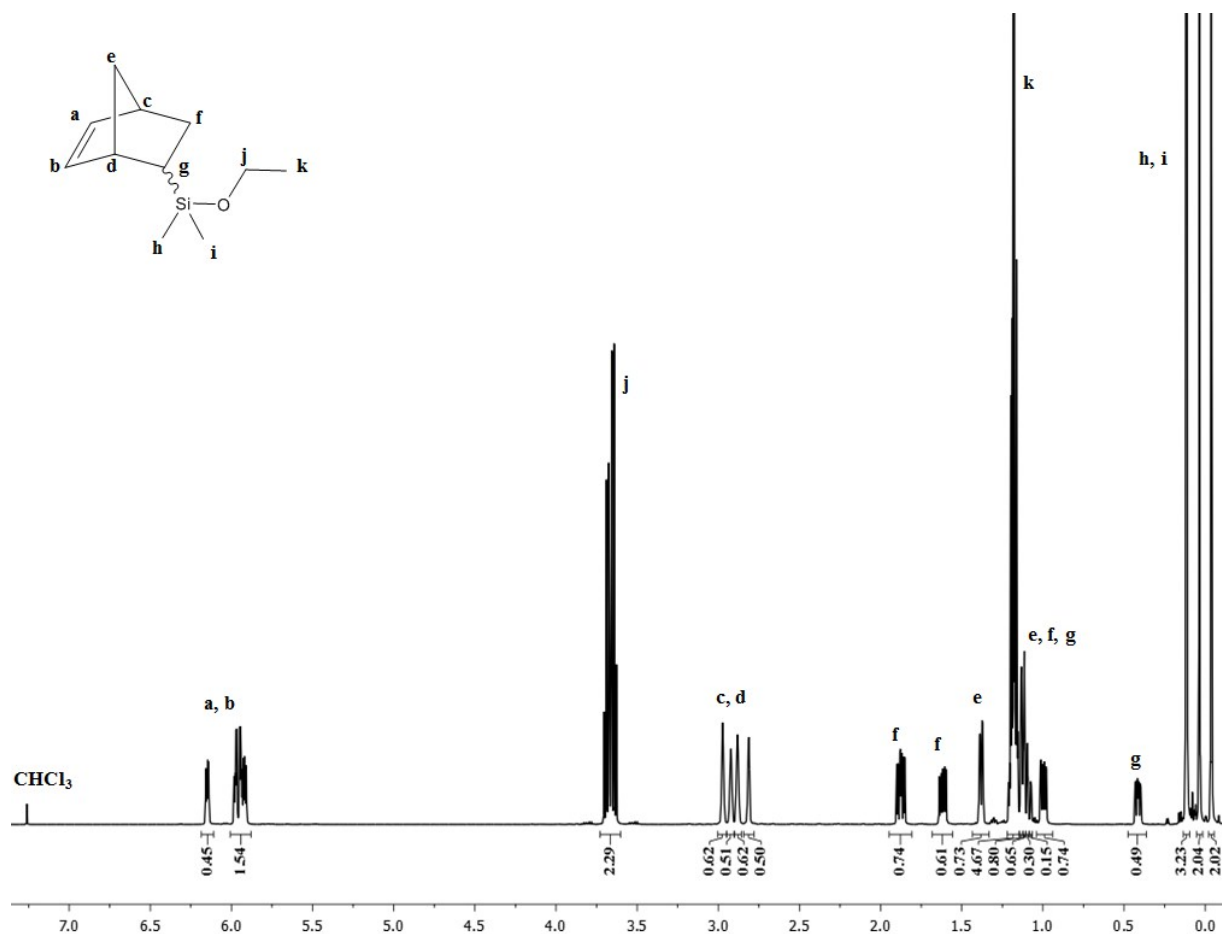

**Figure S11.** <sup>1</sup>H-NMR with appropriate peak positions and integrations for dimethylethoxysilyl norbornene

NMR spectra for dimethylethoxysilyl norbornene:

<sup>1</sup>H NMR (CDCl<sub>3</sub>): δ 6.15 (dd, 1H, minor), 5.98 (dd, 1H, major), 5.94 (dd, 1H, major), 5.92 (dd, 1H, minor), 3.68 (q, 2H, minor), 3.65 (q, 2H, major), 2.97 (br s, 1H, major), 2.92 (br s, 1H, minor), 2.88 (br s, 1H, major), 2.81 (br s, 1H, minor), 1.88 (ddd, 1H, major), 1.62 (ddd, 1H, minor), 1.38 (ddd, 1H, major), 1.19 (t, 3H, minor), 1.18 (t, 3H, major), 1.17 (m, 1H, minor), 1.16 (m, 1H, major), 1.13 (m, 1H, major), 1.12 (m, 1H, major), 1.05 (m, 1H, minor), 1.03 (m, 1H, minor), 1.00 (ddd, 1H, major), 0.41 (ddd, 1H, minor), 0.12 (s, 3H, minor), 0.11 (s, 3H, minor), 0.04 (s, 3H, major), -0.04 (s, 3H, major)

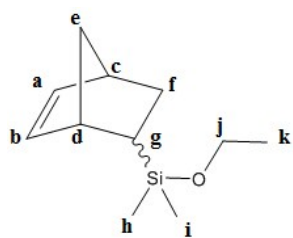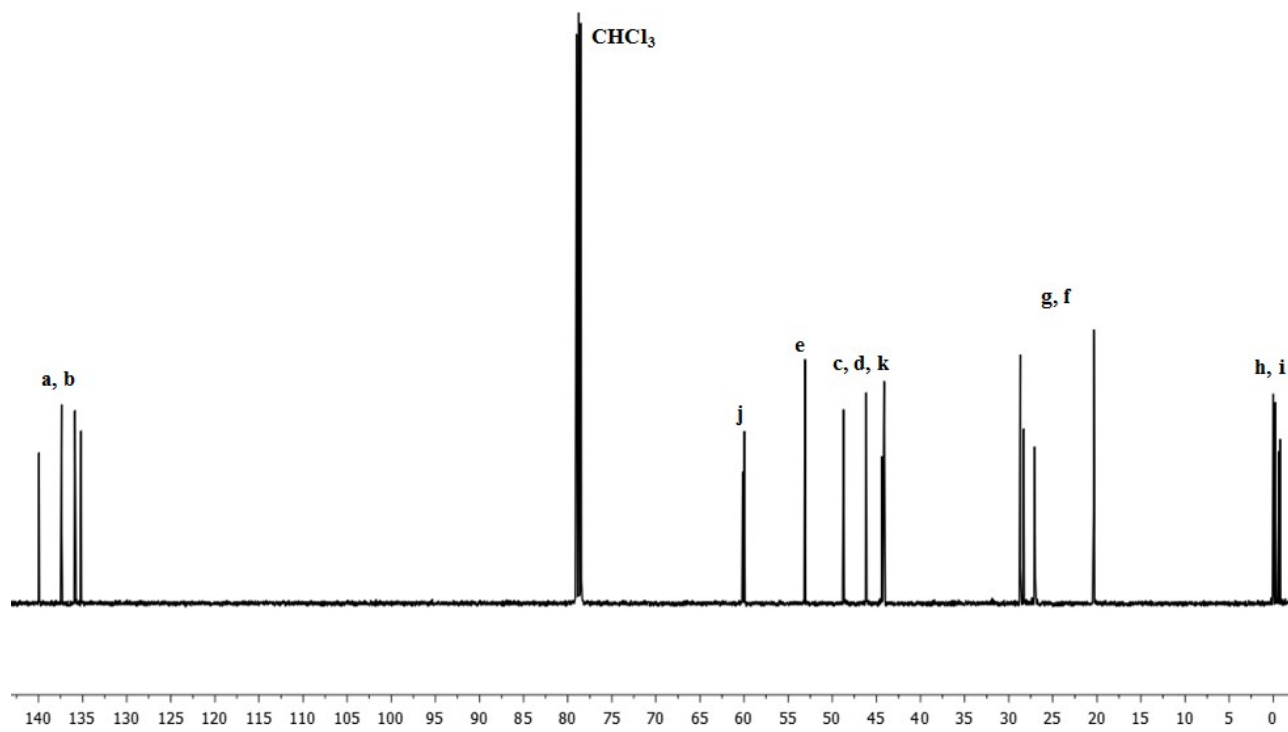

**Figure S12.**  $^{13}\text{C}$ -NMR with appropriate peak positions for dimethylethoxysilyl norbornene

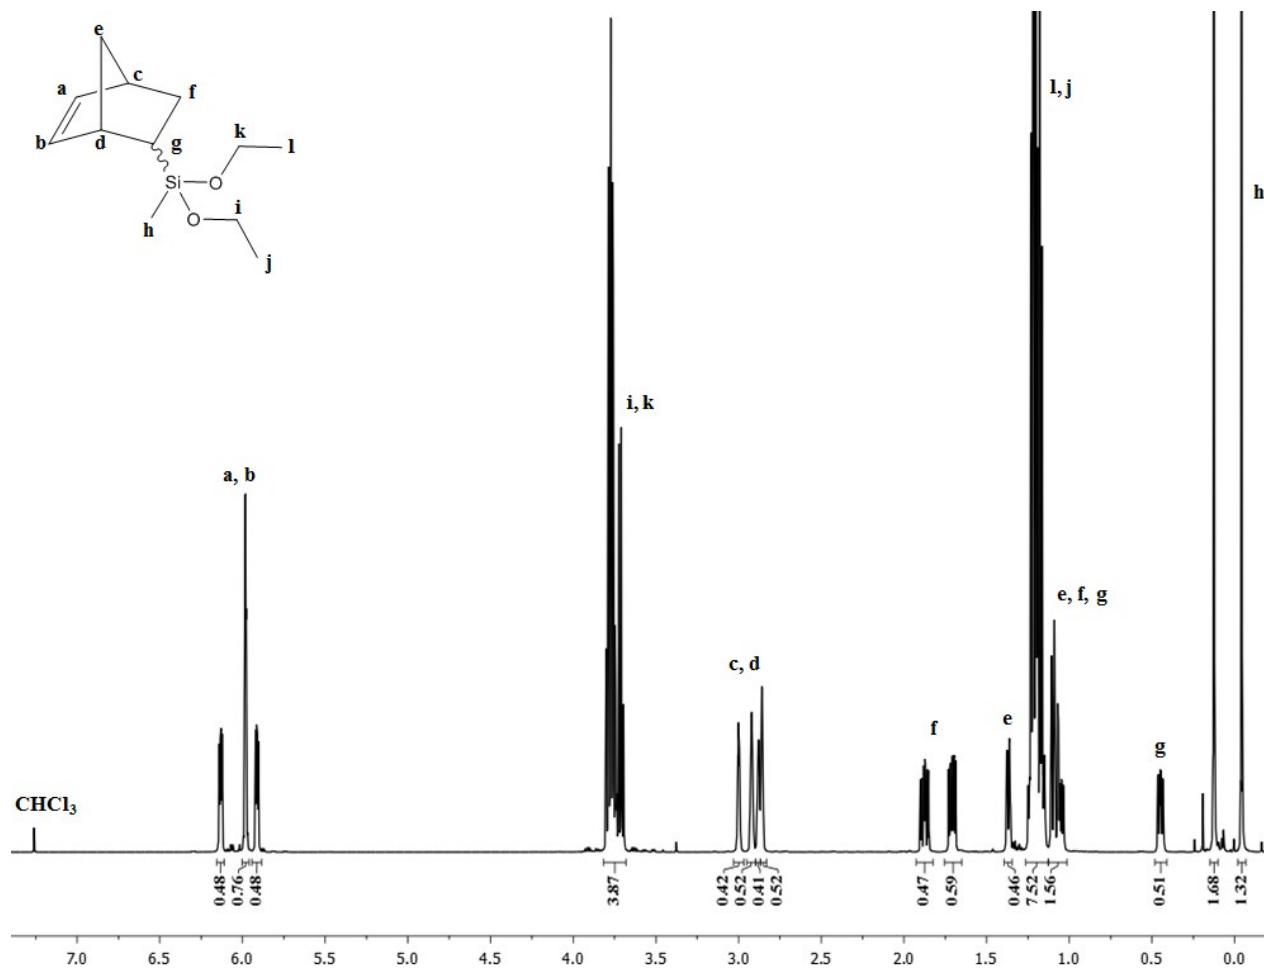

**Figure S13.** <sup>1</sup>H-NMR with appropriate peak positions and integrations for methyldiethoxysilyl norbornene

NMR spectra for methyldiethoxysilyl norbornene:

<sup>1</sup>H NMR (CDCl<sub>3</sub>): δ 6.13 (dd, 1H, major), 5.98 (m, 2H, minor), 5.91 (dd, 1H, major), 3.78 (q, 2H, major), 3.78 (q, 2H, major), 3.76 (q, 2H, minor), 3.72 (q, 2H, minor), 3.00 (m, 1H, minor), 2.92 (br s, 1H, major), 2.88 (m, 1H, minor), 2.86 (br s, 1H, major), 1.88 (ddd, 1H, minor), 1.70 (ddd, 1H, major), 1.38 (m, 1H, minor), 1.36 (m, 1H, major), 1.22 (t, 3H, major), 1.21 (t, 3H, major), 1.20 (t, 3H, minor), 1.18 (t, 3H, minor), 1.17 (m, 1H, major), 1.15 (m, 1H, minor), 1.11 (m, 1H, minor), 1.09 (m, 1H, major), 1.05 (ddd, 1H, minor), 0.45 (ddd, 1H, major), 0.13 (s, 3H, major), -0.04 (s, 3H, minor)

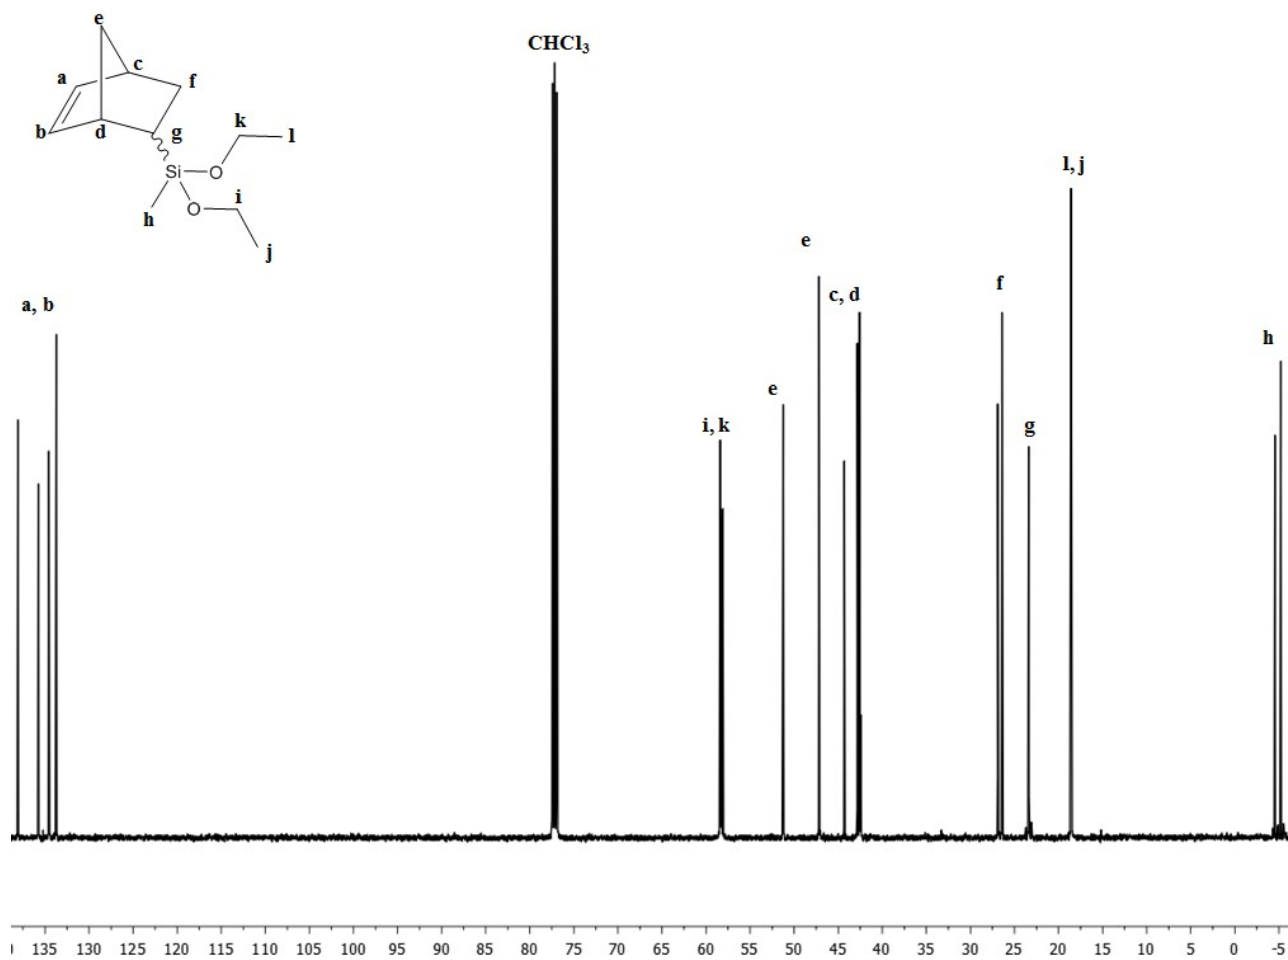

**Figure S14.**  $^{13}\text{C}$ -NMR with appropriate peak positions for methyldiethoxysilyl norbornene

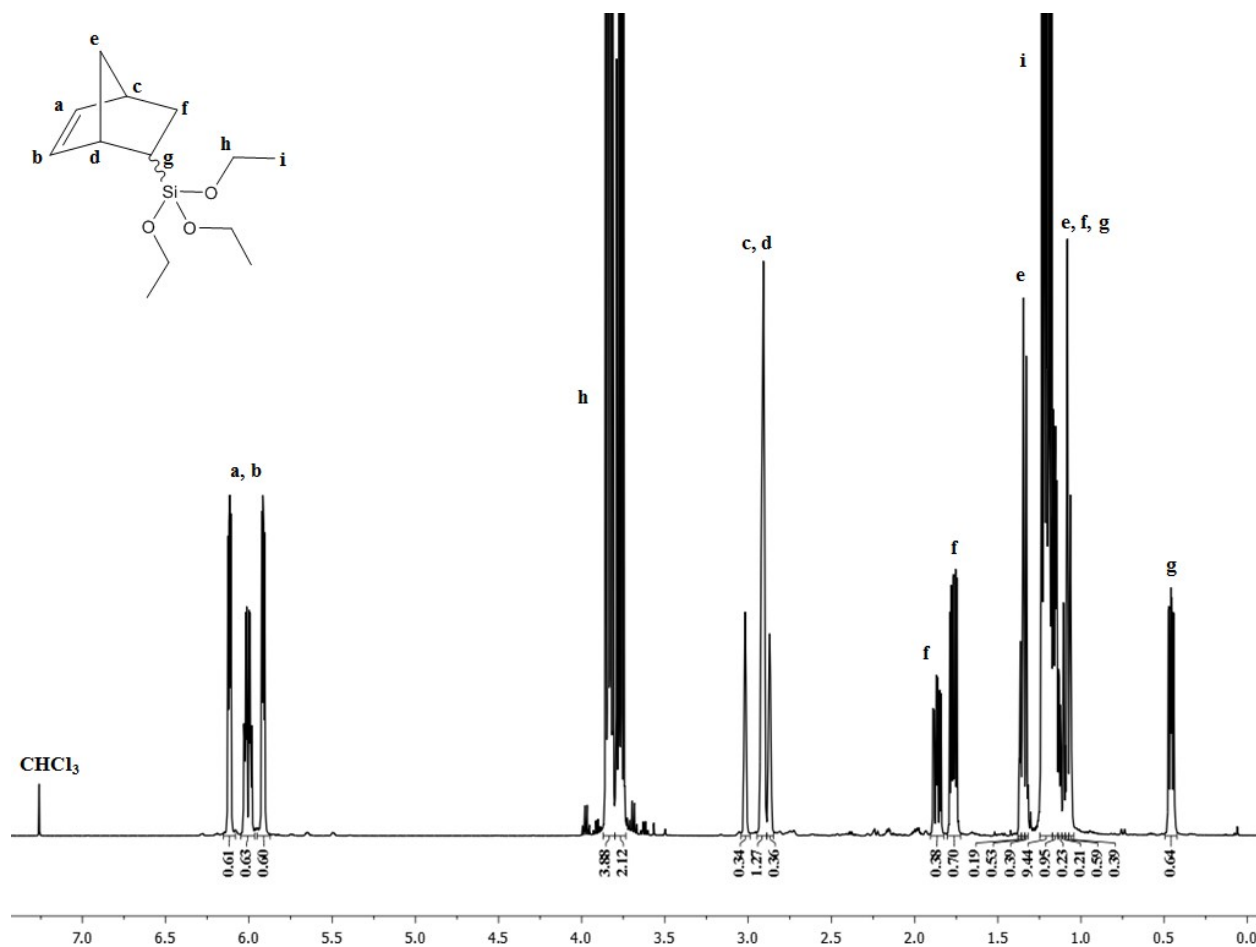

**Figure S15.** <sup>1</sup>H-NMR with appropriate peak positions and integrations for triethoxysilyl norbornene

NMR spectra for triethoxysilyl norbornene:

<sup>1</sup>H NMR (CDCl<sub>3</sub>): δ 6.12 (dd, 1H, major), 6.01 (m, 2H, minor), 5.91 (dd, 1H, major), 3.83 (q, 6H, major), 3.77 (q, 6H, minor), 3.02 (m, 1H, minor), 2.92 (br s, 1H, major), 2.91 (br s, 1H, major), 2.27 (br s, 1H, minor), 1.86 (ddd, 1H, minor), 1.77 (ddd, 1H, major), 1.37 (m, 1H, minor), 1.35 (m, 1H, major), 1.35 (br s, 1H, minor), 1.33 (br s, 1H, major), 1.22 (t, 9H, major), 1.19 (t, 9H, minor), 1.17 (m, 1H, major), 1.15 (m, 1H, minor), 1.08 (m, 1H, minor), 0.45 (ddd, 1H, major)

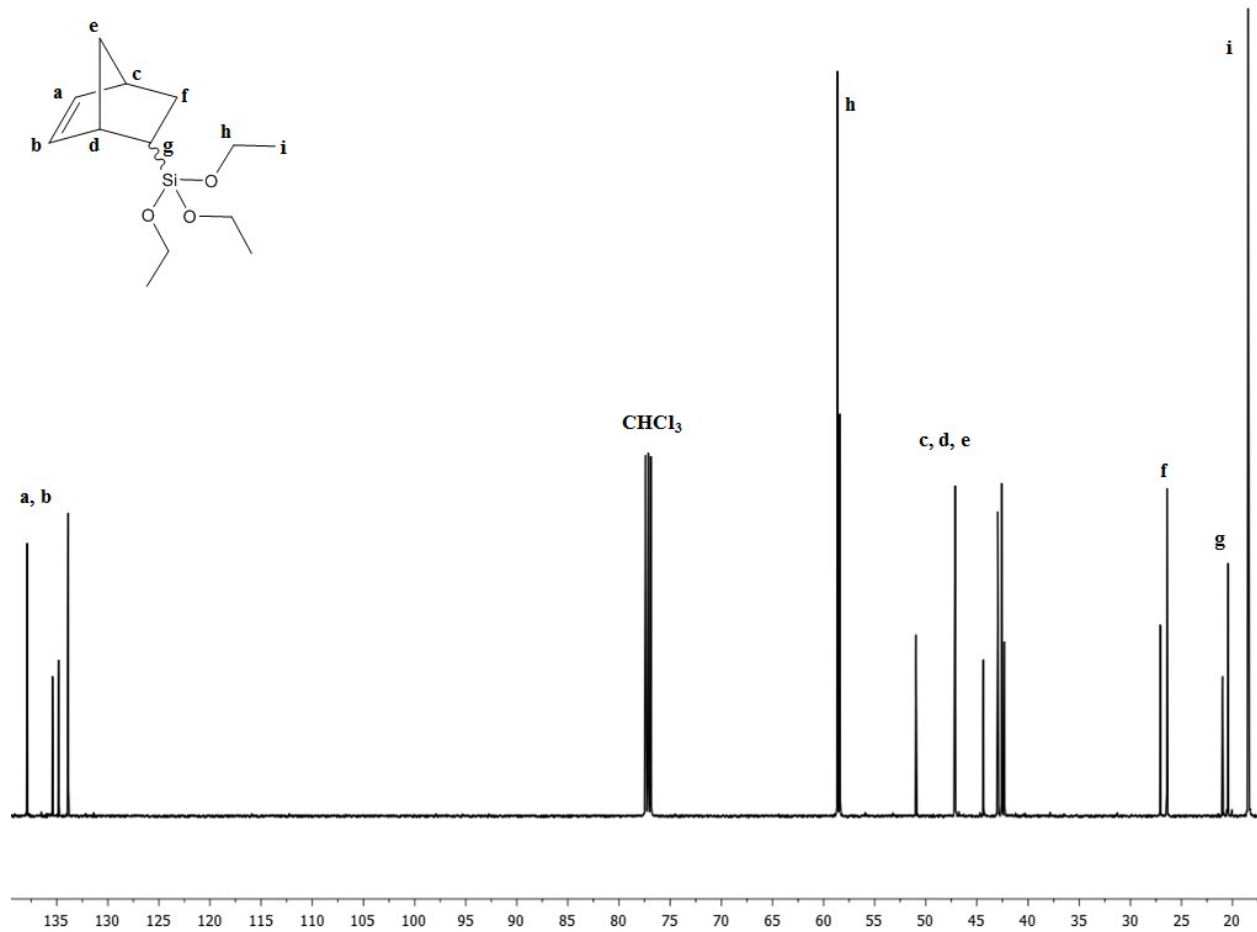

**Figure S16.** <sup>13</sup>C-NMR with appropriate peak positions for triethoxysilyl norbornene



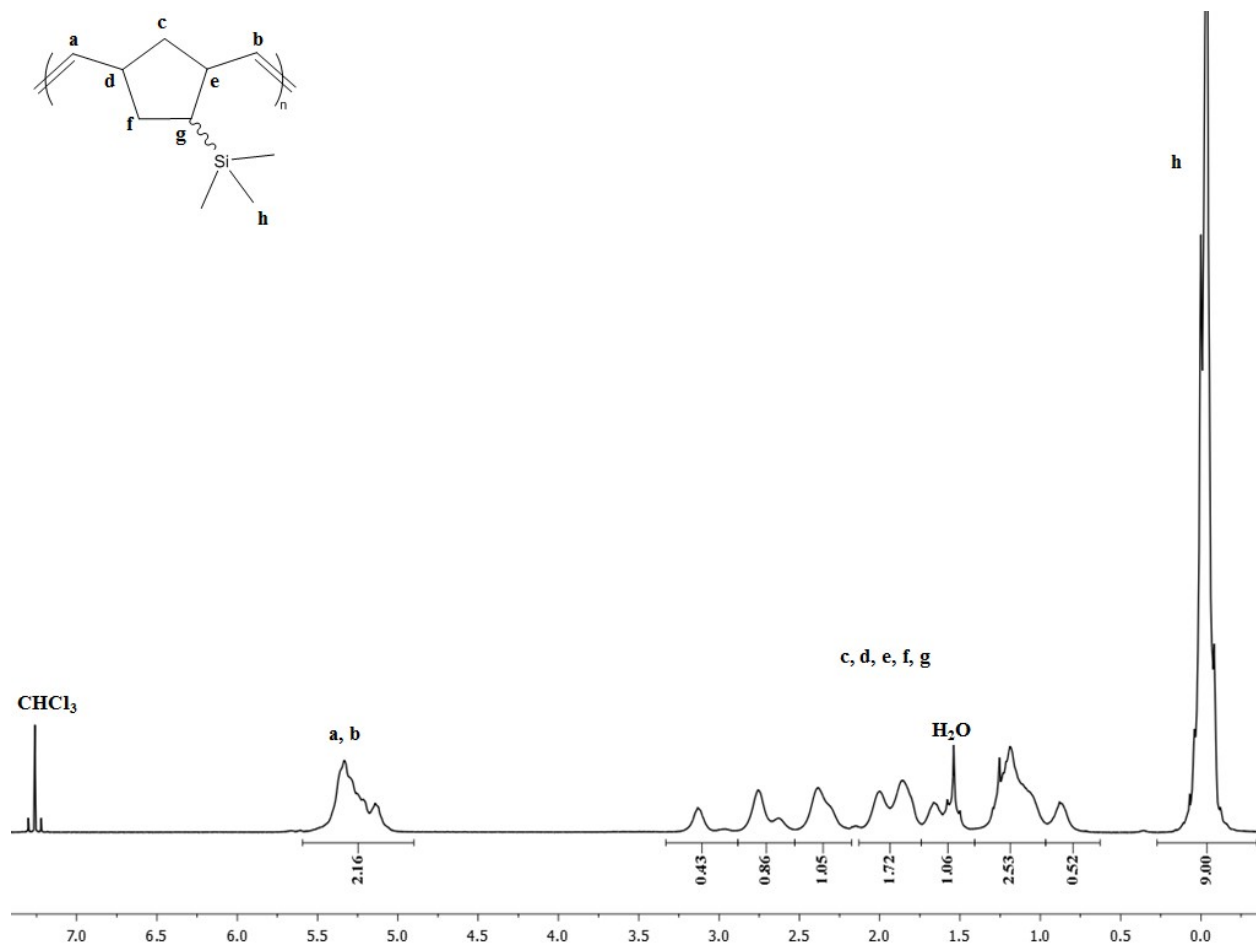

**Figure S17.** <sup>1</sup>H-NMR with appropriate peak positions and integrations for ROMP-SiMe<sub>3</sub>

NMR spectra are in agreement with the formation of ROMP-SiMe<sub>3</sub>.

<sup>1</sup>H NMR (CDCl<sub>3</sub>): δ 5.25 (several broad peaks, 2H, alkenyl), 3.32-0.63 (several broad peaks, aliphatic, 7H), 0.00 and -0.04 (singlets, -Si(CH<sub>3</sub>)<sub>3</sub>, 9H)

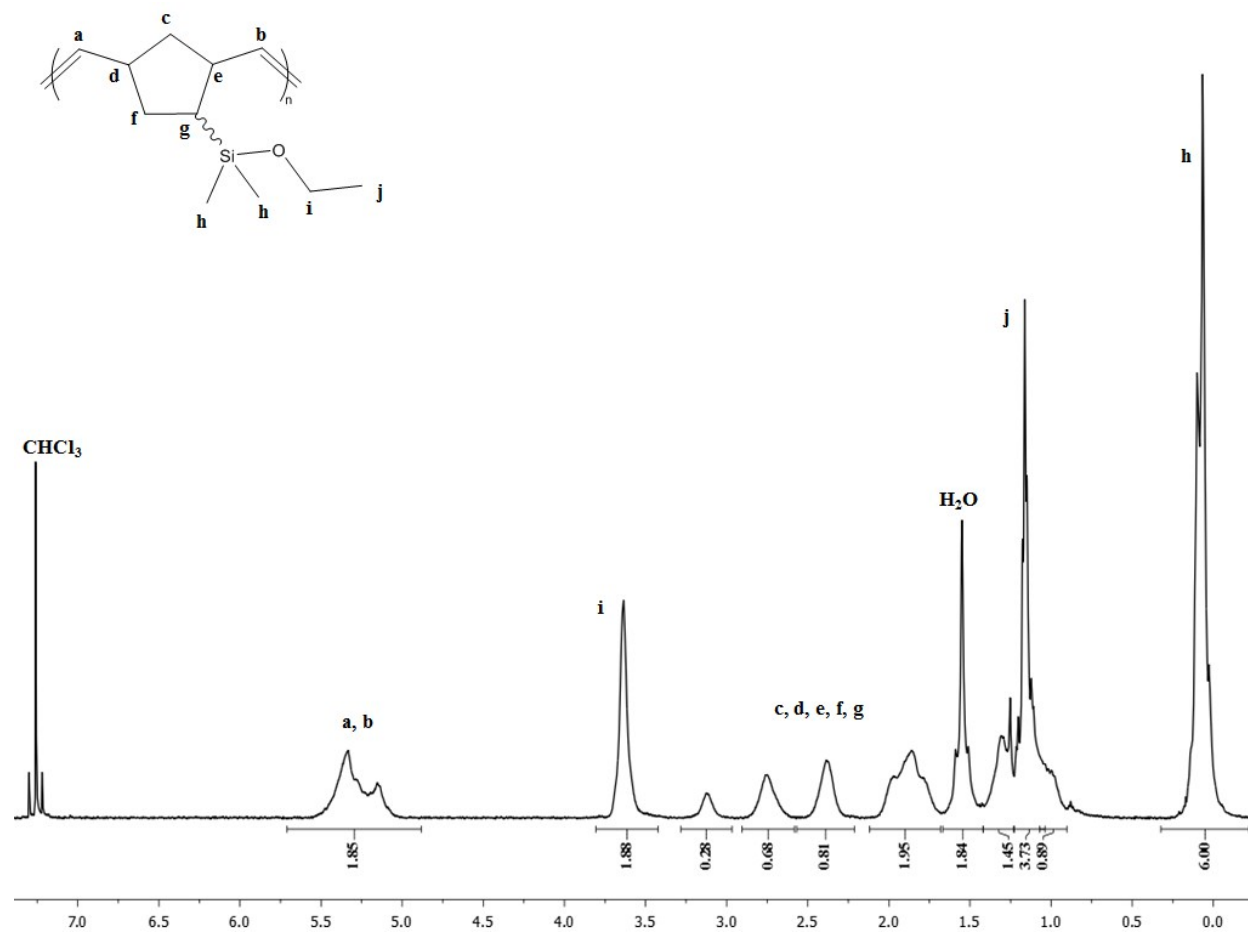

**Figure S18.** <sup>1</sup>H-NMR with appropriate peak positions and integrations for ROMP-SiMe<sub>2</sub>OEt

NMR spectra are in agreement with the formation of ROMP-SiMe<sub>2</sub>OEt.

<sup>1</sup>H NMR (CDCl<sub>3</sub>): δ 5.26 (several broad peaks, 2H, alkenyl), 3.36 (br s, Si(OCH<sub>2</sub>CH<sub>3</sub>), 2H) 3.32-1.42 (several broad peaks, aliphatic, 5H + H<sub>2</sub>O), 1.30 (br s, aliphatic, 1H), 1.17 (s, Si(OCH<sub>2</sub>CH<sub>3</sub>), 3H), 0.16 (br shoulder, aliphatic, 1H), 0.10 and 0.06 (singlets, -Si(CH<sub>3</sub>)<sub>3</sub>, 6H)

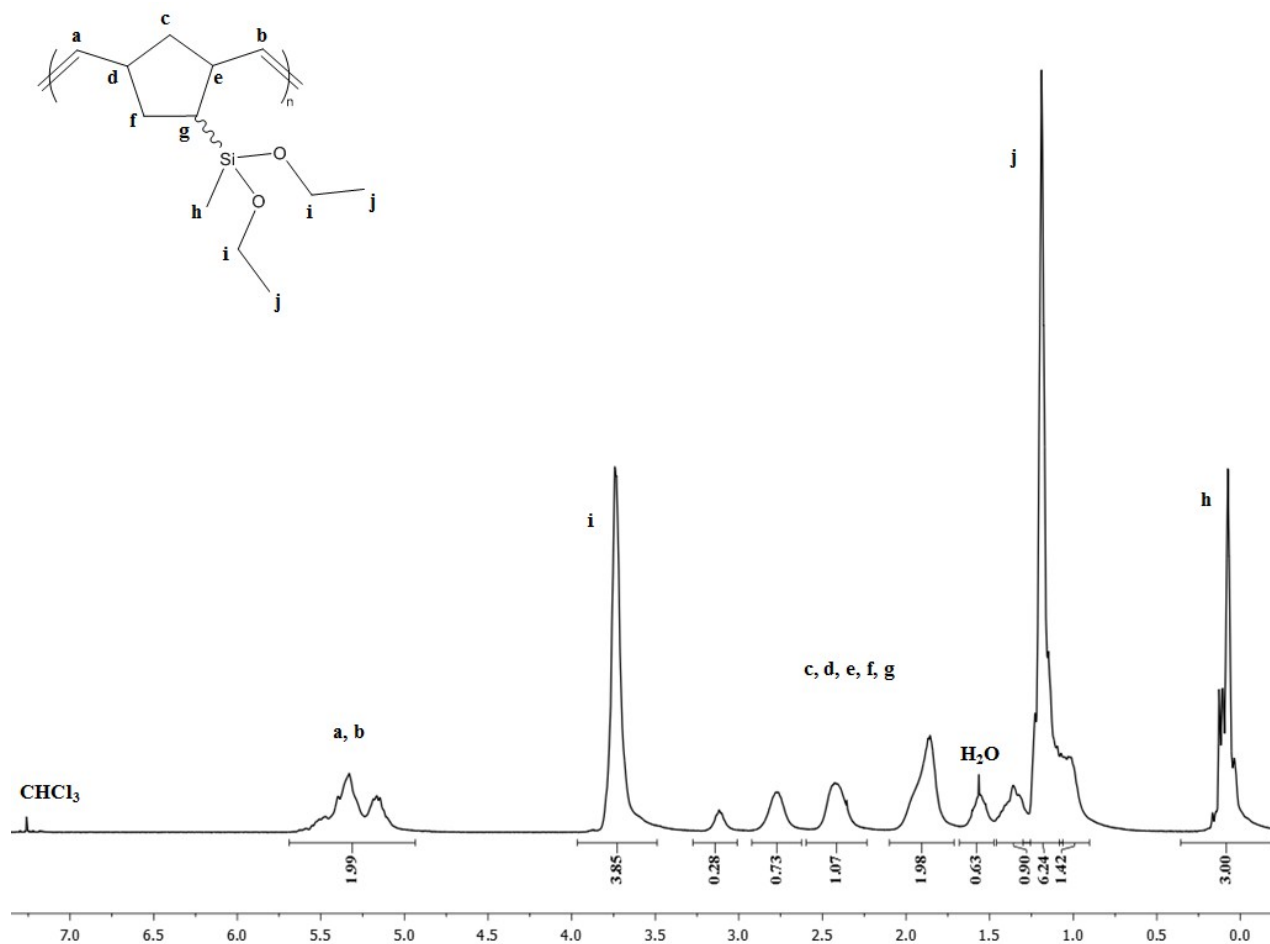

**Figure S19.** <sup>1</sup>H-NMR with appropriate peak positions and integrations for ROMP-SiMe(OEt)<sub>2</sub>

NMR spectra are in agreement with the formation of ROMP-SiMe(OEt)<sub>2</sub>.

<sup>1</sup>H NMR (CDCl<sub>3</sub>): δ 5.28 (several broad peaks, 2H, alkenyl), 3.73 (br s, Si(OCH<sub>2</sub>CH<sub>3</sub>), 4H) 3.27-1.27 (several broad peaks, aliphatic, 6H + H<sub>2</sub>O), 1.19 (s, Si(OCH<sub>2</sub>CH<sub>3</sub>), 6H), 0.16 (br shoulder, aliphatic, 1H), 0.13/0.10 and 0.06 (singlets, -Si(CH<sub>3</sub>)<sub>3</sub>, 3H)

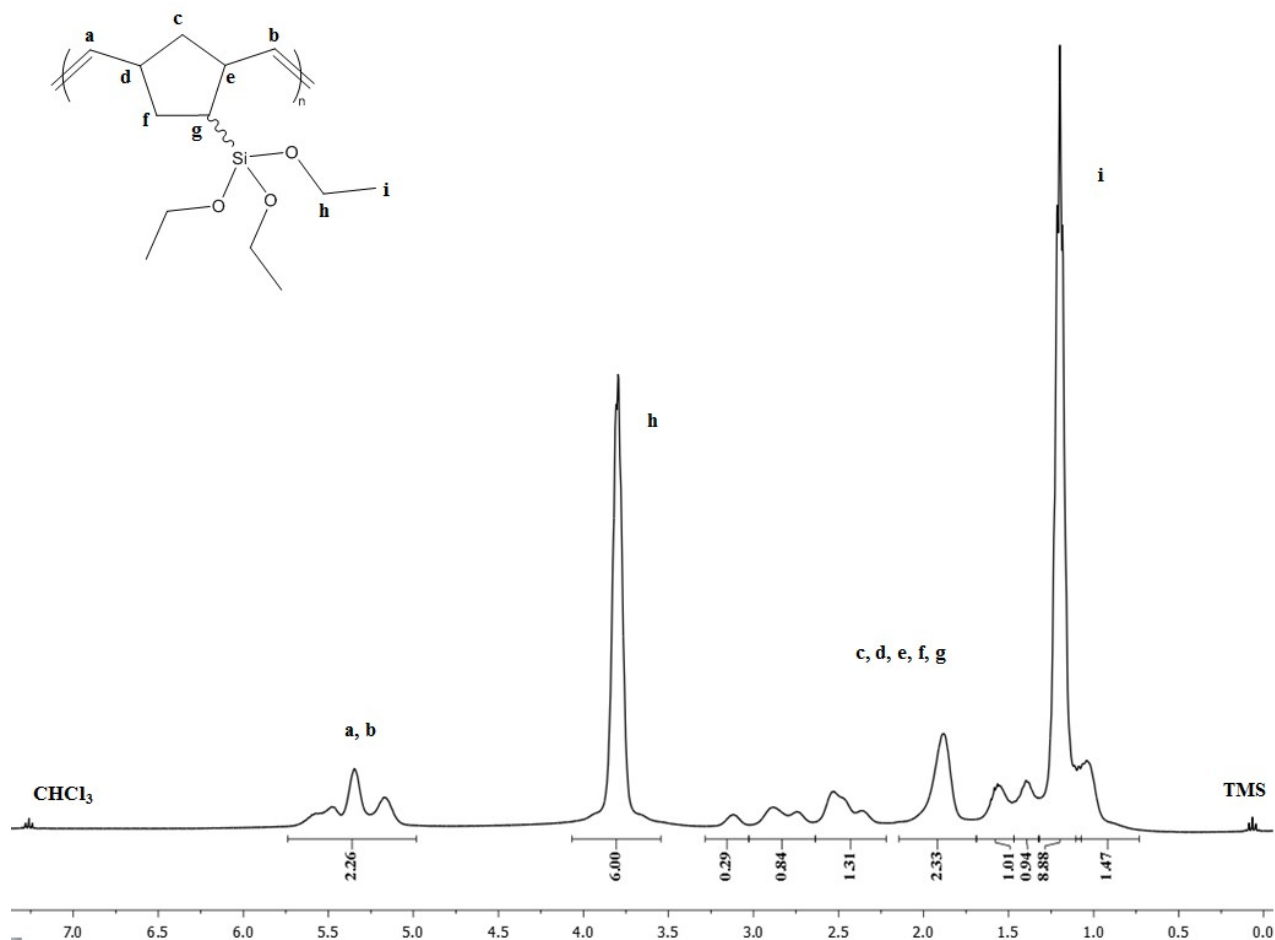

**Figure S20.**  $^1\text{H}$ -NMR with appropriate peak positions and integrations for ROMP-Si(OEt) $_3$

NMR spectra are in agreement with the formation of ROMP-Si(OEt) $_3$ .

$^1\text{H}$  NMR (CDCl $_3$ ):  $\delta$  5.34 (several broad peaks, 2H, alkenyl), 3.80 (br s, Si(OCH $_2$ CH $_3$ ), 6H) 3.27-1.30 (several broad peaks, aliphatic, 6H + H $_2$ O), 1.20 (s, Si(OCH $_2$ CH $_3$ ), 9H), 0.16 (br shoulder, aliphatic, 1H)

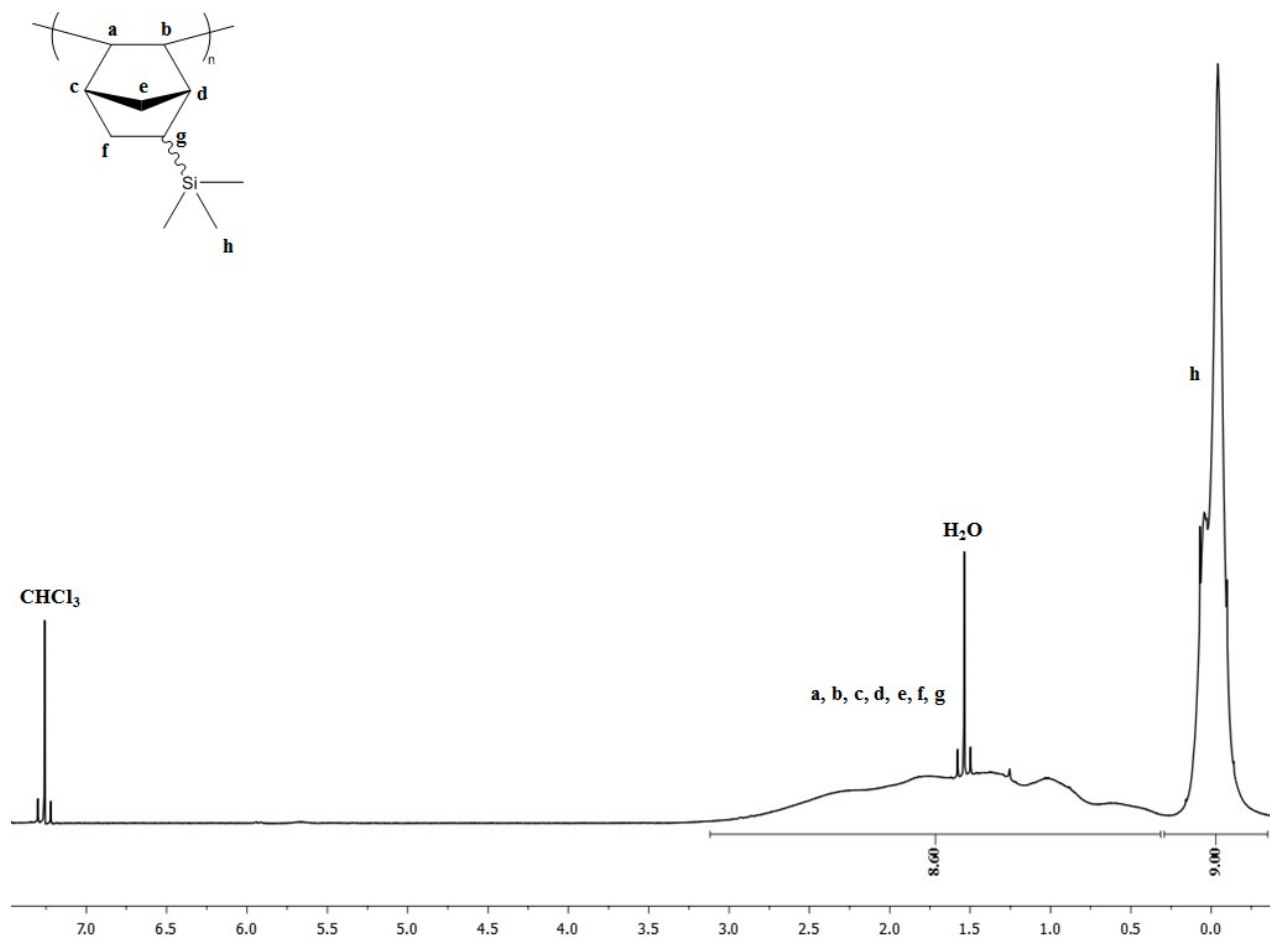

**Figure S21.** <sup>1</sup>H-NMR with appropriate peak positions and integrations for APN-SiMe<sub>3</sub>

NMR spectra are in agreement with the formation of APN-SiMe<sub>3</sub>.

<sup>1</sup>H NMR (CDCl<sub>3</sub>): δ 3.24-0.25 (several broad peaks, aliphatic, 9H), 0.04 and -0.04 (singlets, - Si(CH<sub>3</sub>)<sub>3</sub>, 9H)

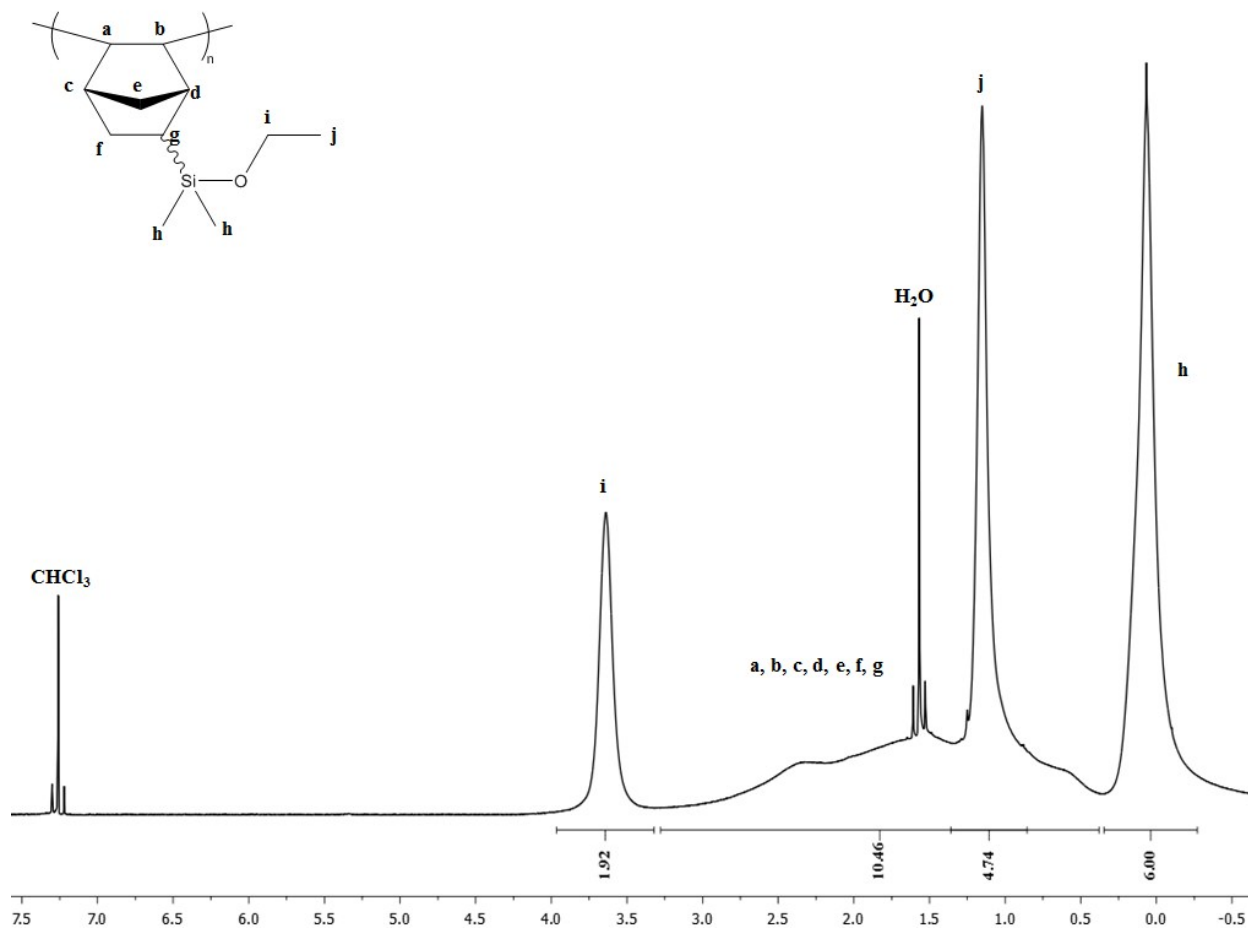

**Figure S22.**  $^1\text{H}$ -NMR with appropriate peak positions and integrations for APN-SiMe<sub>2</sub>OEt

NMR spectra are in agreement with the formation of APN-SiMe<sub>2</sub>OEt.

$^1\text{H}$  NMR (CDCl<sub>3</sub>):  $\delta$  3.64 (br s, Si(OCH<sub>2</sub>CH<sub>3</sub>), 2H), 1.14 (br s, Si(OCH<sub>2</sub>CH<sub>3</sub>), 3H), 3.28-0.35 (several broad peaks, aliphatic, 9H), 0.06 (br s, -Si(CH<sub>3</sub>)<sub>3</sub>, 6H)

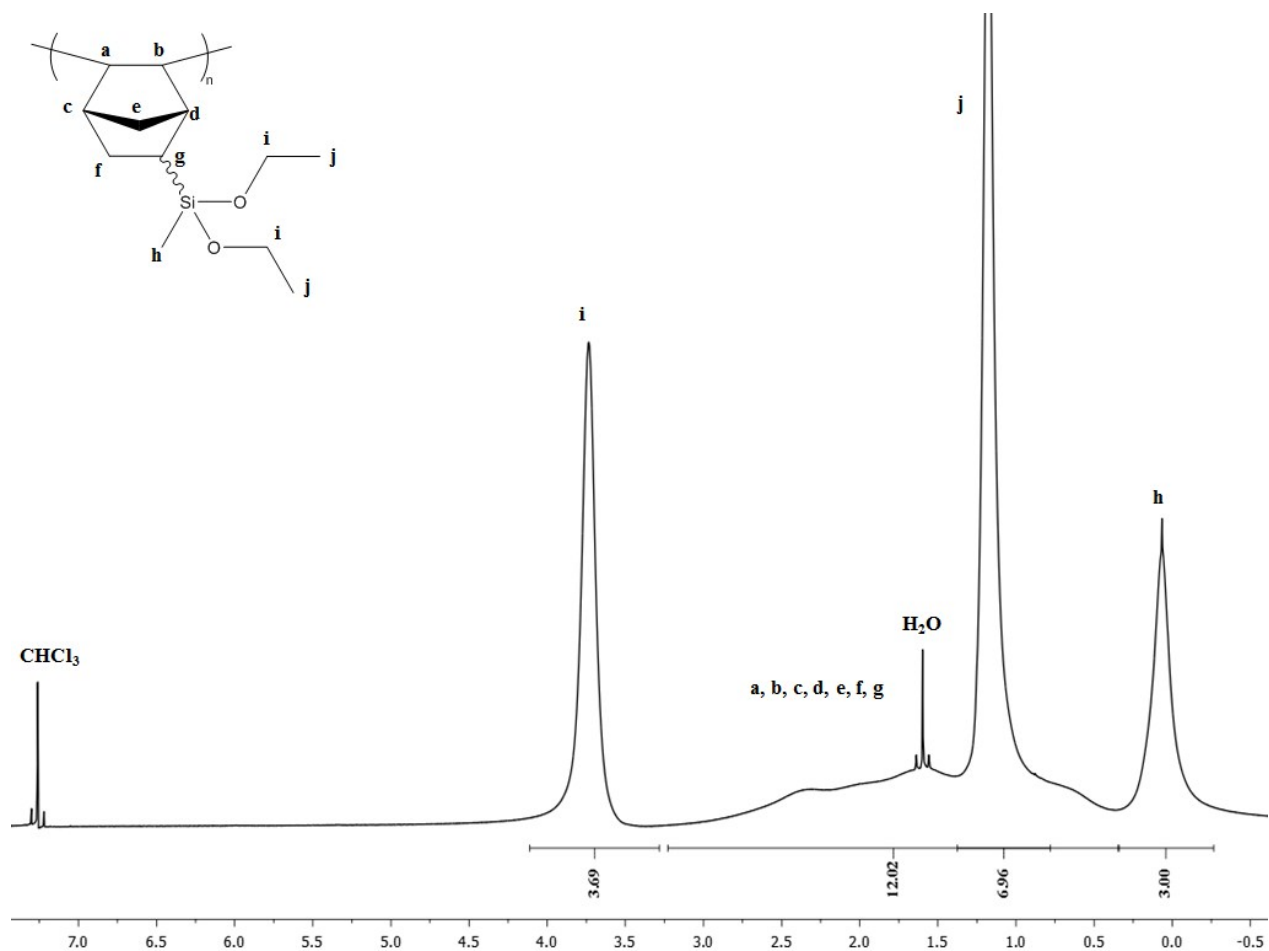

**Figure S23.** <sup>1</sup>H-NMR with appropriate peak positions and integrations for APN-SiMe(OEt)<sub>2</sub>

NMR spectra are in agreement with the formation of APN-SiMe(OEt)<sub>2</sub>.

<sup>1</sup>H NMR (CDCl<sub>3</sub>): δ 3.74 (br s, Si(OCH<sub>2</sub>CH<sub>3</sub>), 4H), 1.17 (br s, Si(OCH<sub>2</sub>CH<sub>3</sub>), 6H), 3.46-0.35 (several broad peaks, aliphatic, 9H), 0.07 (br s, -Si(CH<sub>3</sub>)<sub>3</sub>, 3H)

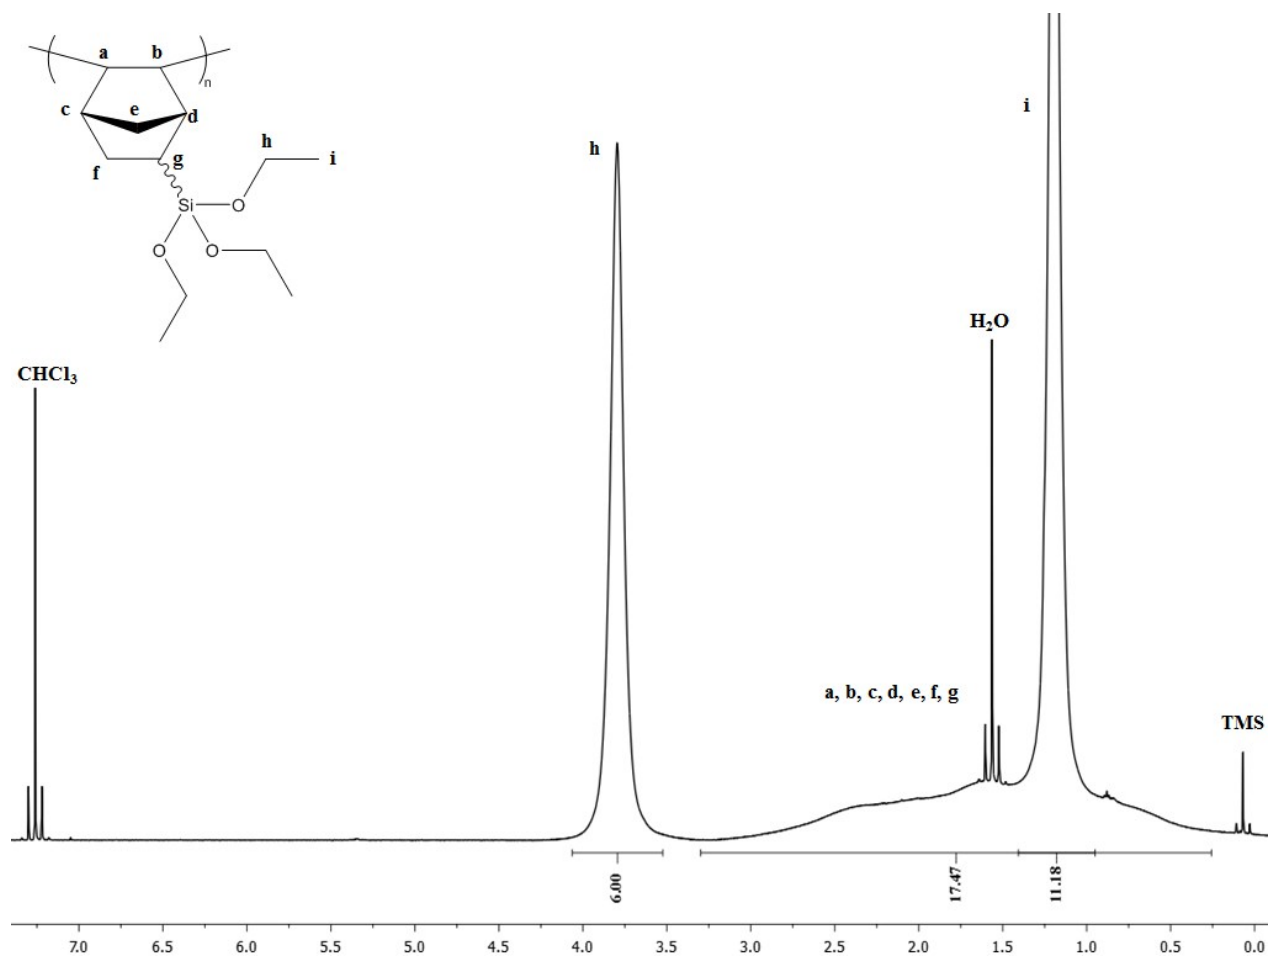

**Figure S24.** <sup>1</sup>H-NMR with appropriate peak positions and integrations for APN-Si(OEt)<sub>3</sub>

NMR spectra are in agreement with the formation of APN-Si(OEt)<sub>3</sub>.

<sup>1</sup>H NMR (CDCl<sub>3</sub>): δ 3.79 (br s, Si(OCH<sub>2</sub>CH<sub>3</sub>), 6H), 1.19 (br s, Si(OCH<sub>2</sub>CH<sub>3</sub>), 9H), 3.42-0.16 (several broad peaks, aliphatic, 9H)
